# Supplementary material for: Electron transfer dynamics across self-assembled N-(2-mercaptoethyl) octadecanamide/mycolic acid layers: impedimetric insights into the structural integrity and interaction with anti-mycolic acid antibodies
Source: Royal Society of Chemistry journal article supplement (doi:10.1039/b915930d), 2009-11-12
Supplement: b915930d.pdf [file b915930d.pdf]

## **SUPPORTING INFORMATION**

### **Electron transfer dynamics across self-assembled N-(2-mercaptoethyl) octadecanamide / mycolic acid layers: Impedimetric insights into the structural integrity and interaction with anti-mycolic acid antibodies†**

Kenneth I. Ozoemena<sup>\*,a,b</sup>, Nsovo S. Mathebula<sup>b</sup>, Jeseelan Pillay<sup>b</sup>, Gianna Toschi<sup>b</sup> and Jan A. Verschoor<sup>c</sup>

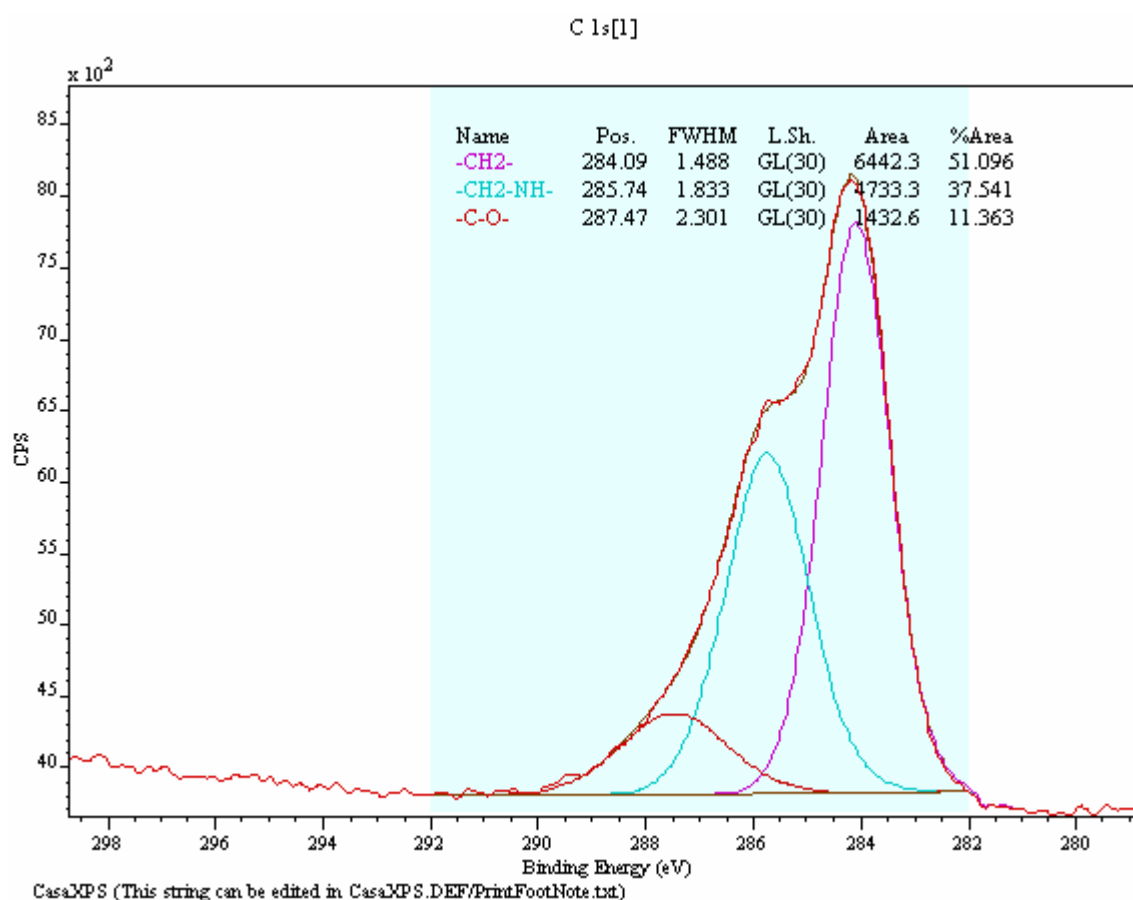

**Figure SI 1a:** Core level XPS spectra of Au-MEODA for C (1s).

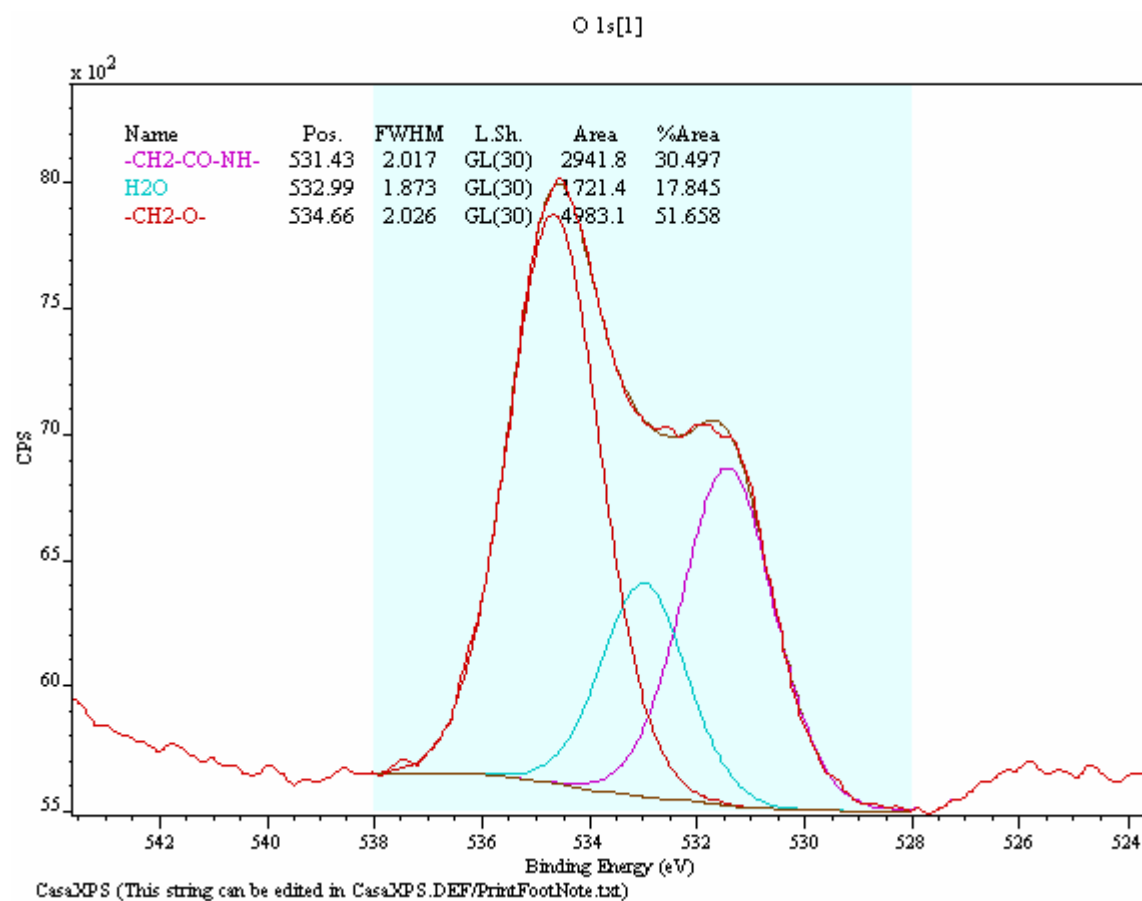

**Figure SI 1b:** Core level XPS spectra of Au-MEODA for O (1s).
